# Supplementary material for: Hydrophobic core formation and secondary structure elements in uranyl(vi)-binding peptides
Source: Royal Society of Chemistry journal article supplement (doi:10.1039/d1cp05401e), 2022-01-01
Supplement: d1cp05401e1.pdf [file d1cp05401e1.pdf]

## Electronic Supporting Information

### Title: Hydrophobic Core Formation and Secondary Structure Elements in Uranyl(VI)–Binding Peptides

Authors: Satoru Tsushima and Koichiro Takao

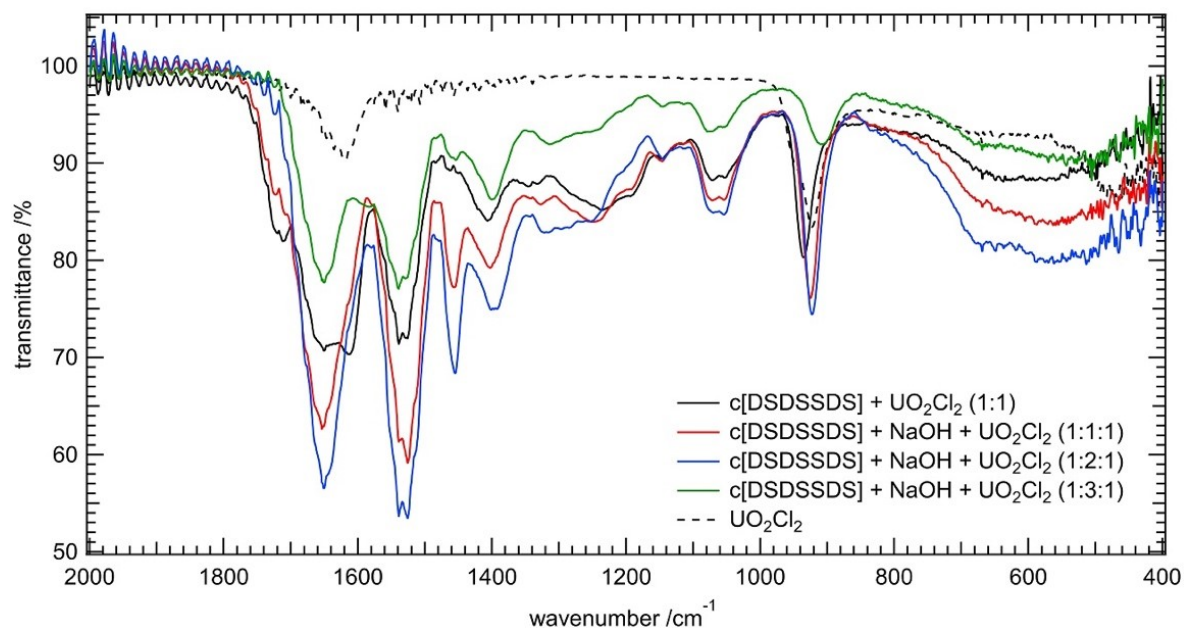

**Fig. S1** FTIR-ATR spectra of  $\text{c[DSDSSDS]}$  in the presence of  $\text{UO}_2^{2+}$  with different amount of NaOH.

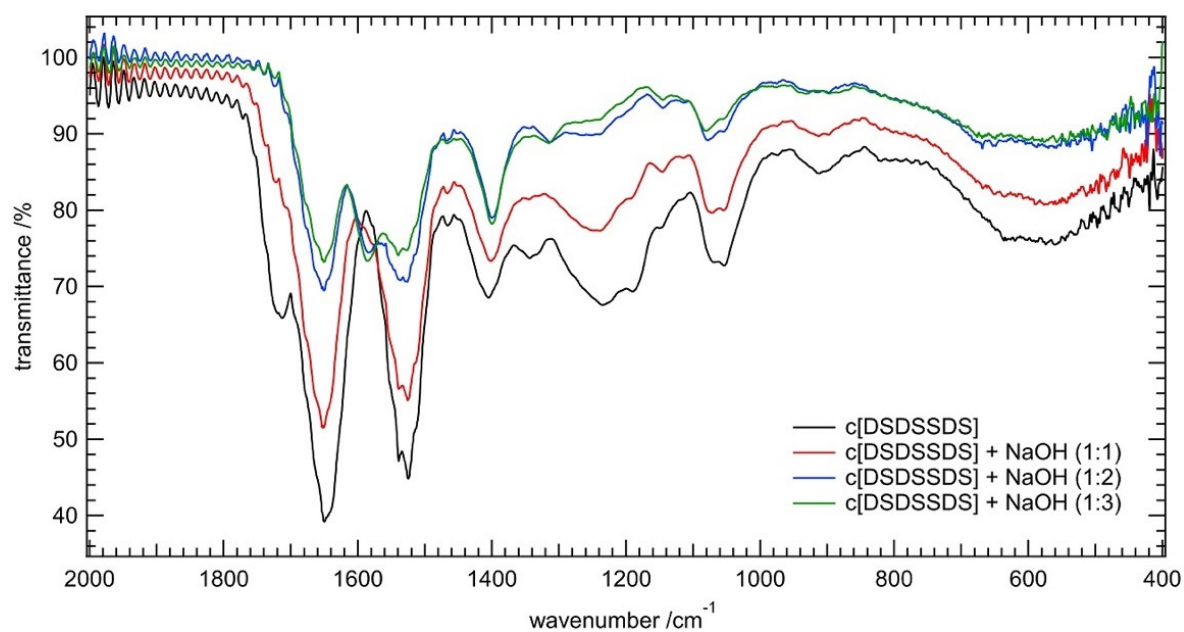

**Fig. S2** FTIR-ATR spectra of  $\text{c[DSDSSDS]}$  in the absence of  $\text{UO}_2^{2+}$  with different amount of NaOH.

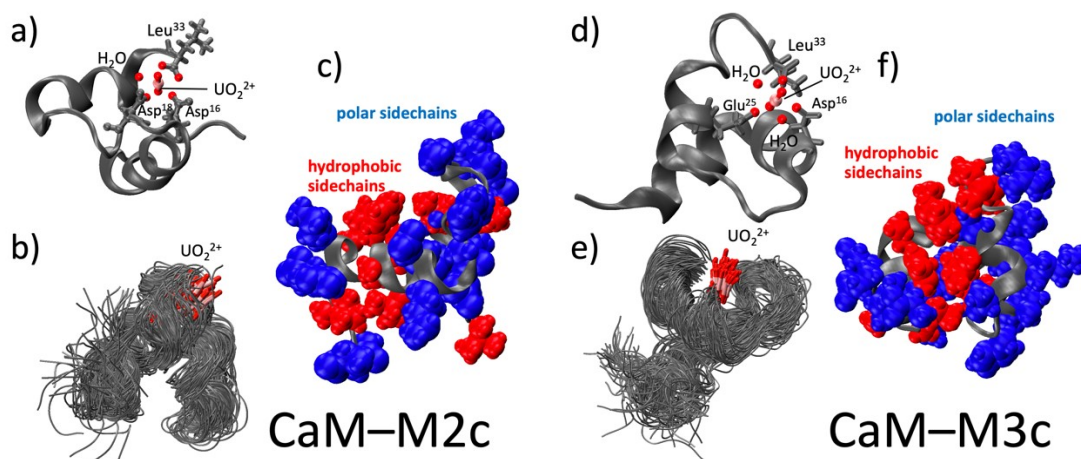

**Fig. S3** Structures of  $\text{UO}_2^{2+}$ -bound CaM-M2c (a,b,c) and CaM-M3c (d,e,f) from the MD trajectories. Waters and  $\text{Na}^+$  ions are omitted for clarity. (a,d): Global view on the peptide along the  $\text{O}=\text{U}=\text{O}$  axis from the MD snapshot at  $t = 200$  ns. Peptide in dark ribbon, uranium in pink ball, oxygens in the vicinity of uranium in red balls. (b,e): Superpositions of 100 snapshots from 200 ns MD trajectory (each 2 ns). Peptide in gray ribbon and  $\text{UO}_2^{2+}$  in pink and red. (c,f): Global view on the peptide at  $t = 200$  ns. Peptide in dark ribbon, hydrophobic sidechains in red, polar sidechains in blue spheres.

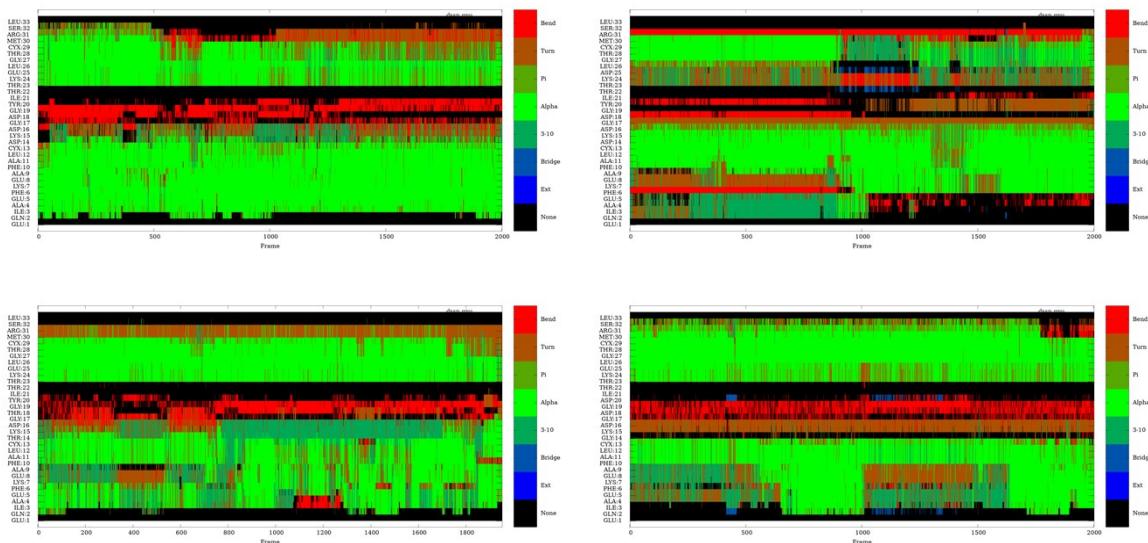

**Fig. S4** Analysis of secondary structure elements of the  $\text{UO}_2^{2+}$ -bound CaM-M1c (top, left), CaM-M2c (top, right), CaM-M3c (bottom, left), and CaM-U2 (bottom, right) from the MD trajectories based on DSSP (hydrogen bond analysis algorithm).

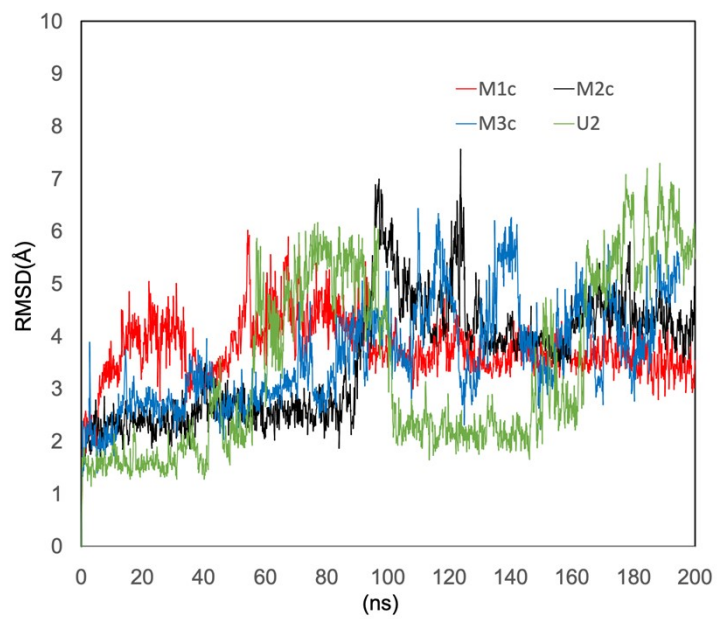

**Fig. S5** Time evolution of RMSD of backbone atoms from 200 ns trajectories of MD simulations of CaM-M1c, CaM-M2c, CaM-M3c, and CaM-U2 with  $\text{UO}_2^{2+}$ .
